# Supplementary material for: In vivo formation of natural HgSe nanoparticles in the liver and brain of pilot whales
Source: PubMed Central journal article supplement (PMC5039623; doi:10.1038/srep34361), 2016-09-28
Supplement: srep34361-s1.pdf [file srep34361-s1.pdf]

## Supplementary Information for

### *In vivo* formation of natural nanoparticles in the liver and brain of pilot whales

*Zuzana Gajdosechova<sup>a</sup>, Mohammed M. Lawan<sup>a</sup>, Dagmar S. Urgast<sup>a</sup>, Andrea Raab<sup>a</sup>, Kirk G. Scheckel<sup>b</sup>, Enzo Lombi<sup>c</sup>, Peter M. Kopittke<sup>d</sup>, Katrin Loeschner<sup>e</sup>, Erik H. Larsen<sup>e</sup>, Glenn Woods<sup>f</sup>, Andrew Brownlow<sup>g</sup>, Fiona L. Read<sup>h</sup>, Jörg Feldmann<sup>a</sup>, Eva M. Krupp<sup>a</sup>*

<sup>a</sup>Trace Element Speciation Laboratory, Department of Chemistry, Meston Walk, University of Aberdeen, Aberdeen, AB24 3UE, UK. <sup>b</sup>United States Environmental Protection Agency, National Risk Management Research Laboratory, 5995 Center Hill Avenue, Cincinnati, OH 45224, USA. <sup>c</sup>Centre for Environmental Risk Assessment and Remediation, University of South Australia, Building X, Mawson Lakes Campus, Mawson Lakes, 5095 South Australia. <sup>d</sup>School Agriculture and Food Sciences, The University of Queensland, St Lucia, Queensland, 4072, Australia. <sup>e</sup>National Food Institute, Technical University of Denmark, Mørkhøj Bygade 19, DK-2860 Søborg, Denmark. <sup>f</sup>Agilent Technologies Ltd, 5500 Lakeside, Cheadle, SK8 3GR, UK. <sup>g</sup>SAC Wildlife Unit, Inverness, UK. <sup>h</sup>Oceanlab, University of Aberdeen, Main Street, Newburgh, Aberdeenshire, AB41 6AA, UK.

\*corresponding author: Eva M. Krupp, Email: [e.krupp@abdn.ac.uk](mailto:e.krupp@abdn.ac.uk)

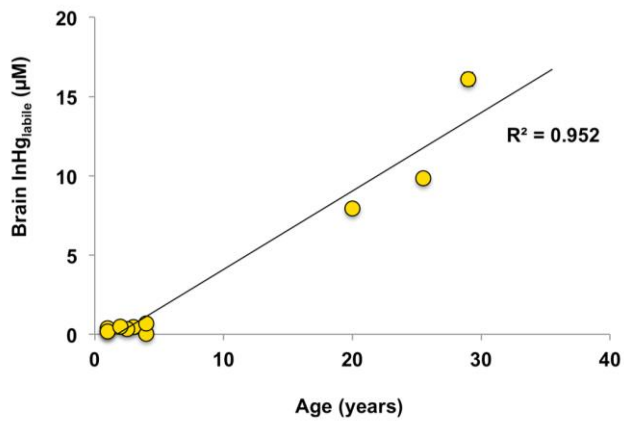

**Figure S1. Evidence of MeHg demethylation in the brain of stranded pilot whales.** Increasing concentration of labile inorganic Hg in the brain indicates positive demethylation mechanism as inorganic Hg cannot cross the blood brain barrier. Labile inorganic Hg is defined as fraction of inorganic Hg susceptible to derivatisation.

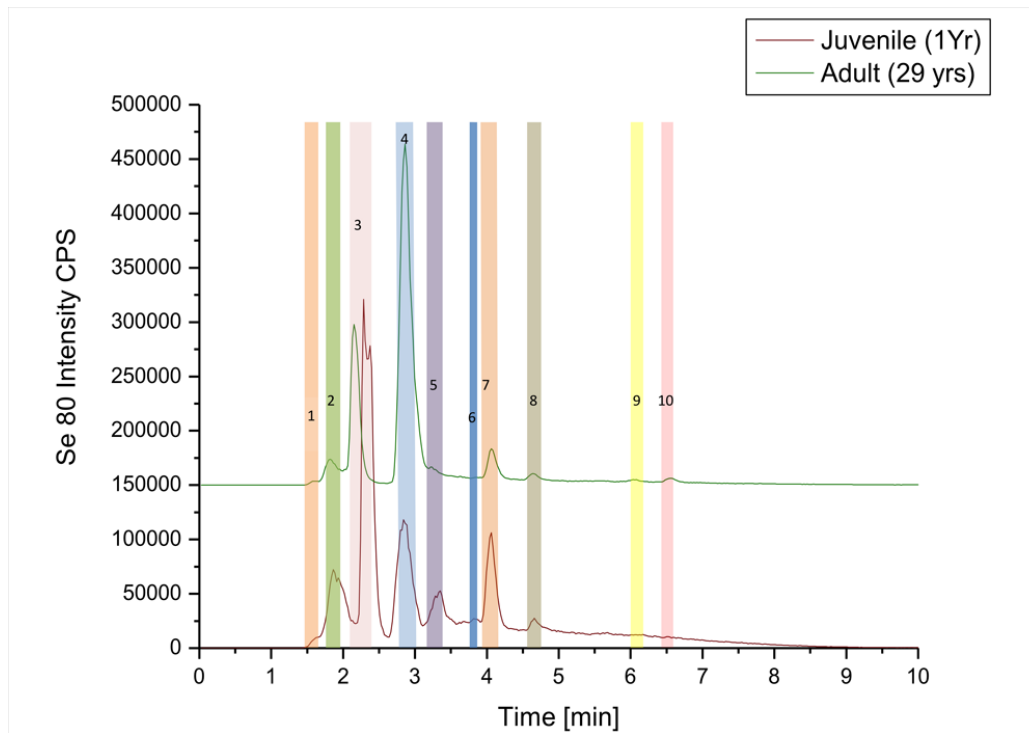

**Figure S2. Chromatogram generated by reverse phase HPLC-ICP-MS of whale brain tissues with separated Se species.** 1= unk 1, 2= [SeCys]<sub>2</sub>, 3= SeCys-CAM, 4= Se-DTT, 5= selenomethionine, 6= unk 2, 7= S-methyl-SeCys, 8= Seleno-cystathionine, 9= unk 3, 10= unk 4.

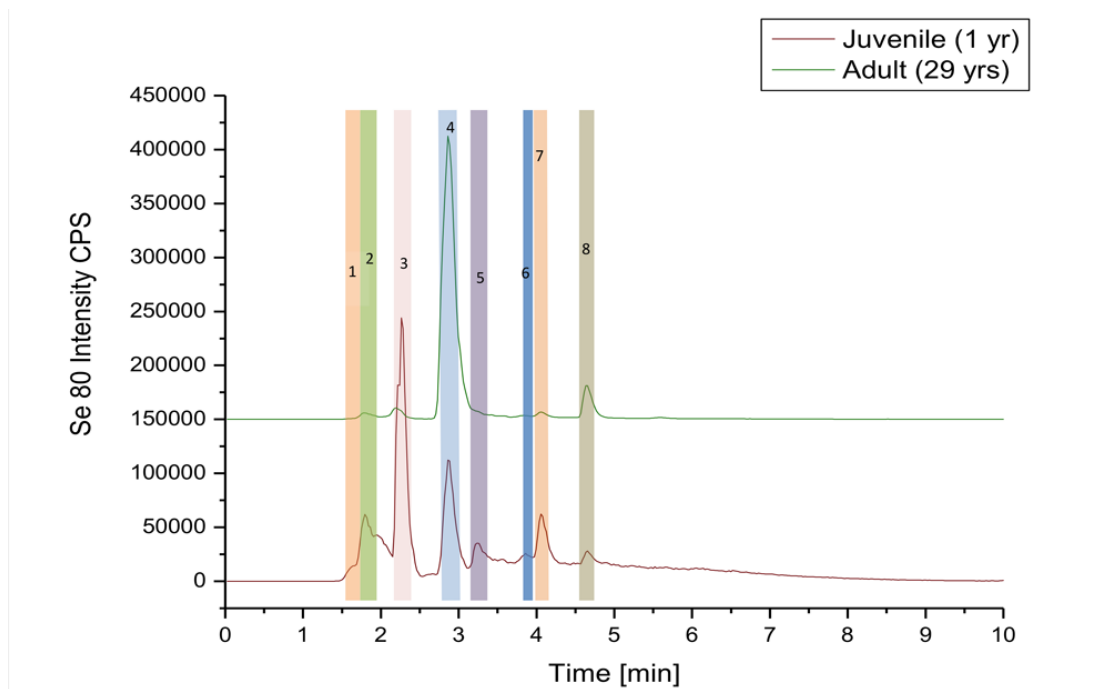

**Figure S3. Chromatogram generated by reverse phase HPLC-ICP-MS of whale liver tissues with separated Se species.** 1= unk 1, 2= [SeCys]<sub>2</sub>, 3= SeCys-CAM, 4= Se-DTT, 5= selenomethionine, 6= unk 2, 7= S-Me-SeCys, 8= Seleno-cystathionine.

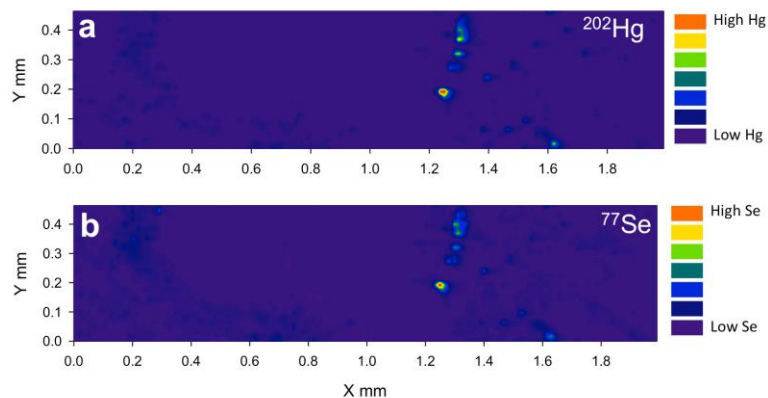

**Figure S4. Localisation of particles containing Hg and Se.** 2D map of <sup>202</sup>Hg (a) and <sup>77</sup>Se (b) distribution in 15 µm thin section of the adult whale liver tissue. Elemental map generated by LA-ICP-MS shows hotspots of high <sup>202</sup>Hg and <sup>77</sup>Se intensities in yellow/red colour, which indicate aggregation of these elements. Location of the hotspots on the individual maps suggests co-localization of Hg and Se within the same aggregates.

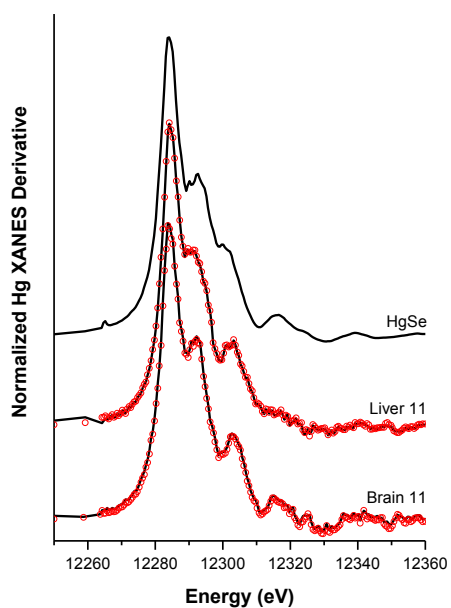

**Figure S5. Identification of bioformed HgSe nanoparticles.** Synchrotron generated Hg  $L_{III}$  XANES spectra of HgSe standard and whale tissues. Experimental data is shown as solid lines and the red points show the linear combination fitting. Strong similarities in the spectra of a HgSe standard and the liver and brain of an adult whale (Liver 11, Brain 11), indicate high proportion of Hg being present in the form of HgSe particles.

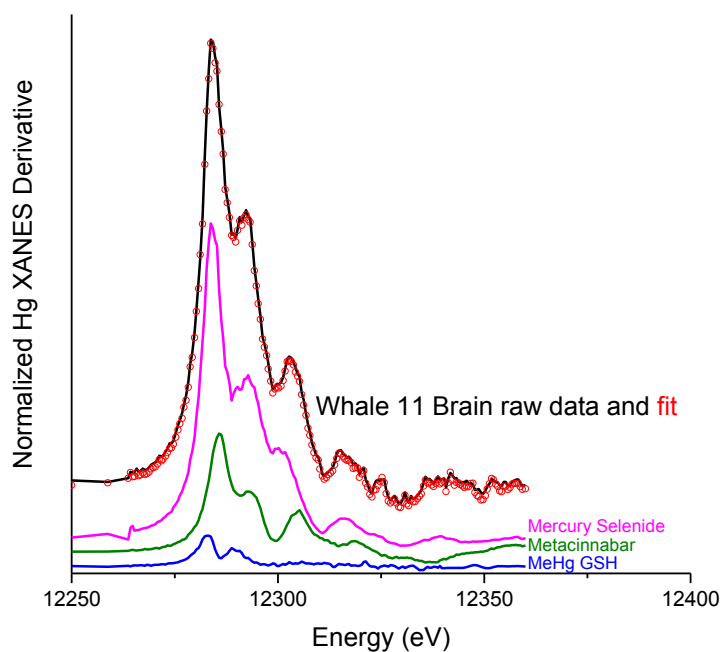

**Figure S6. Identification of bioformed HgSe nanoparticles.** Synchrotron generated Hg  $L_{III}$  XANES spectra of selected Hg standards and adult whale brain tissues. Experimental data is shown as solid lines and the red points show the linear combination fitting.

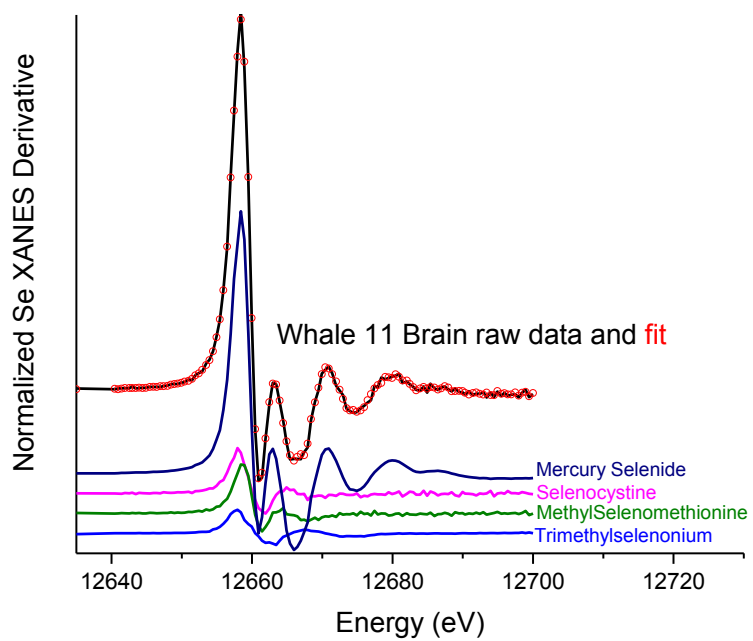

**Figure S7. Identification of bioformed HgSe nanoparticles.** Synchrotron generated Se K-edge XANES spectra of selected Se standards and adult whale liver tissues. Experimental data is shown as solid lines and the red points show the linear combination fitting.

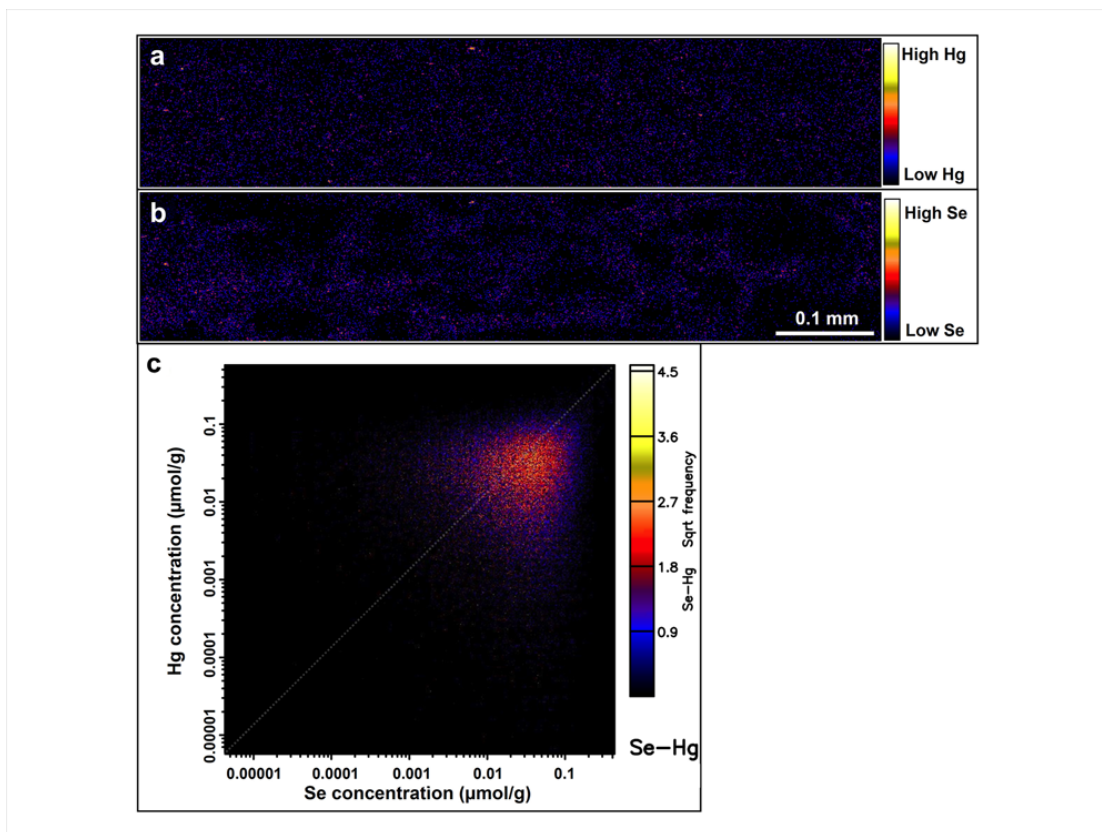

**Figure S8. Interaction of Hg and Se of Se-Hg clusters.** **a** Hg distribution map in 30  $\mu\text{m}$  thin section of juvenile whale liver generated by synchrotron  $\mu\text{-XRF}$  shows absence of Hg aggregates. Similar pattern can be seen for Se distribution in panel **b** suggesting slow reaction rate of demethylation mechanism leading to the formation of Se-Hg aggregates in the juvenile whale. Elemental association plot in panel **c** indicates no correlation between Hg and Se. White line indicates Hg and Se molar ratio of 1.

**Table S1 Concentrations of measured total Hg, MeHg, InHg<sub>labile</sub> and total Se in the wet brain tissue of pilot whales.**

| Whale ID/Gender | Age year | Total Hg (µM) |       | MeHg (µM) |       | MeHg | InHg <sub>labile</sub> (µM) |        | InHg <sub>bound</sub> | Se (µM) |      | Se:Hg |
|-----------------|----------|---------------|-------|-----------|-------|------|-----------------------------|--------|-----------------------|---------|------|-------|
|                 |          | AV            | SD    | AV        | SD    | %    | AV                          | SD     | %                     | AV      | SD   |       |
| 1 F             | 2.5      | NA            |       | NA        |       | NA   | NA                          |        | NA                    | NA      |      |       |
| 2 F             | 25.5     | 57.6          | 4.36  | 4.35      | 0.183 | 7.53 | 9.85                        | 0.032  | 75.4                  | 73.0    | 9.8  | 1.3   |
| 3 F             | 17       | NA            |       | NA        |       | NA   | NA                          |        | NA                    | NA      |      |       |
| 4 F             | 25*      | NA            |       | NA        |       | NA   | NA                          |        | NA                    | NA      |      |       |
| 5 F             | 20       | 47.5          | 3.17  | 5.55      | 0.201 | 11.7 | 7.94                        | 0.073  | 71.6                  | 64.8    | 4.03 | 1.4   |
| 6 F             | 1*       | 0.902         | 0.123 | 0.615     | 0.018 | 66.3 | 0.215                       | 0.018  | 9.87                  | 28.6    | 2.61 | 31.7  |
| 7 F             | 1*       | 2.87          | 0.283 | 2.26      | 0.063 | 78.3 | 0.375                       | 0.033  | 8.67                  | 36.9    | 3.9  | 12.9  |
| 8 F             | 1*       | 0.85          | 0.008 | 0.665     | 0.014 | 76.0 | 0.18                        | 0.004  | 2.89                  | 21.1    | 3.69 | 24.8  |
| 9 M             | 6*       | NA            |       | NA        |       | NA   | NA                          |        | NA                    | NA      |      |       |
| 10 F            | 4        | 3.13          | 0.337 | 2.09      | 0.084 | 66.9 | 0.027                       | 0.0003 | 32.3                  | 18.7    | 2.49 | 6.0   |
| 11 F            | 29       | 135           | 11.0  | 10.9      | 0.763 | 8.13 | 16.1                        | 0.428  | 80.0                  | 178     | 13.0 | 1.3   |
| 12 F            | 3        | 3.3           | 0.341 | 3.01      | 0.069 | 90.8 | 0.463                       | 0.062  | ND                    | 26.2    | 1.93 | 7.9   |
| 13 F            | 9        | 8.47          | 1.11  | 3.68      | 0.332 | 43.5 | ND                          |        | NA                    | 30.4    | 3.44 | 3.6   |
| 14 M            | 2.5      | 2.46          | 0.113 | 1.68      | 0.046 | 68.8 | 0.338                       | 0.023  | 17.4                  | 22.7    | 0.71 | 9.2   |
| 15 F            | 35.5     | NA            |       | NA        |       | NA   | NA                          |        | NA                    | NA      |      |       |
| 16 M            | 4        | 2.56          | 0.398 | 1.73      | 0.204 | 68.2 | 0.674                       | 0.082  | 5.41                  | 21.4    | 1.34 | 8.4   |
| 17 M            | 2        | 2.05          | 0.109 | 1.8       | 0.124 | 87.4 | 0.473                       | 0.058  | ND                    | 87.9    | 10.1 | 42.9  |
| 18 F            | 25       | NA            |       | NA        |       | NA   | NA                          |        | NA                    | NA      |      |       |
| 19 M            | 15       | NA            |       | NA        |       | NA   | NA                          |        | NA                    | NA      |      |       |
| 20 F            | 28       | NA            |       | NA        |       | NA   | NA                          |        | NA                    | NA      |      |       |
| 21 M            | 16       | NA            |       | NA        |       | NA   | NA                          |        | NA                    | NA      |      |       |

InHg<sub>labile</sub> is defined as inorganic Hg susceptible to derivatisation. InHg<sub>bound</sub> was operationally defined as HgT - (MeHg + Hg<sub>labile</sub>). Asterisk (\*) indicates whales, which tooth for age determination was not available and therefore the length of the individual was used for estimation of the age. NA indicates tissues, which were not available for analysis. ND means value not defined. SD is standard of triplicate sample analysis. All concentrations are calculated in the wet weight.

**Table S2 Concentrations of measured total Hg, MeHg, InHg<sub>labile</sub> and total Se in the wet liver tissue of pilot whales.**

| Whale ID/Gender | Age year | Total Hg (mM) |        | MeHg (µM) |       | MeHg % | InHg <sub>labile</sub> (µM) |       | InHg <sub>bound</sub> % | Se (mM) |       | Se:Hg |
|-----------------|----------|---------------|--------|-----------|-------|--------|-----------------------------|-------|-------------------------|---------|-------|-------|
|                 |          | AV            | SD     | AV        | SD    |        | AV                          | SD    |                         | AV      | SD    |       |
| 1 F             | 2.5      | 0.027         | 0.002  | 5.1       | 0.206 | 18.7   | ND                          |       |                         | 0.073   | 0.008 | 2.7   |
| 2 F             | 25.5     | 1.22          | 0.028  | 30.9      | 2.82  | 2.52   | ND                          |       |                         | 1.55    | 0.19  | 1.3   |
| 3 F             | 17       | 0.764         | 0.036  | 27.1      | 0.632 | 3.54   | ND                          |       |                         | 0.984   | 0.063 | 1.3   |
| 4 F             | 25*      | 1.13          | 0.059  | 27.6      | 1.03  | 2.43   | ND                          |       |                         | 1.32    | 0.044 | 1.2   |
| 5 F             | 20       | 0.771         | 0.082  | 16.8      | 0.395 | 2.18   | ND                          |       |                         | 0.956   | 0.051 | 1.2   |
| 6 F             | 1*       | 0.005         | 0.0002 | 1.73      | 0.13  | 32.0   | 0.831                       | 0.005 | 52.4                    | 0.05    | 0.015 | 10.0  |
| 7 F             | 1*       | 0.007         | 0.001  | 1.93      | 0.068 | 28.2   | ND                          |       |                         | 0.028   | 0.002 | 4.0   |
| 8 F             | 1*       | 0.007         | 0.001  | 2.02      | 0.067 | 28.4   | ND                          |       |                         | 0.03    | 0.008 | 4.3   |
| 9 M             | 6*       | 0.219         | 0.015  | 13.7      | 0.492 | 6.27   | ND                          |       |                         | 0.292   | 0.044 | 1.3   |
| 10 F            | 4        | 0.157         | 0.022  | 9.32      | 0.556 | 5.92   | ND                          |       |                         | 0.211   | 0.017 | 1.3   |
| 11 F            | 29       | 2.37          | 0.068  | 29.7      | 0.808 | 1.26   | 141                         | 6.73  | 92.8                    | 2.57    | 0.361 | 1.1   |
| 12 F            | 3        | 0.051         | 0.002  | 7.58      | 0.202 | 14.9   | ND                          |       |                         | 0.089   | 0.005 | 1.7   |
| 13 F            | 9        | 0.323         | 0.025  | 15.7      | 0.224 | 4.85   | ND                          |       |                         | 0.467   | 0.017 | 1.4   |
| 14 M            | 2.5      | 0.031         | 0.003  | 4.76      | 0.162 | 15.4   | ND                          |       |                         | 0.117   | 0.019 | 3.8   |
| 15 F            | 35.5     | 2.32          | 0.141  | 24.3      | 1.13  | 1.05   | 290                         | 9.37  | 86.9                    | 2.41    | 0.304 | 1.0   |
| 16 M            | 4        | 0.044         | 0.001  | 6.26      | 0.216 | 14.1   | ND                          |       |                         | 0.081   | 0.007 | 1.8   |
| 17 M            | 2        | 0.017         | 0.002  | 3.87      | 0.246 | 22.7   | ND                          |       |                         | 0.049   | 0.005 | 2.9   |
| 18 F            | 25       | 1.01          | 0.071  | 26.0      | 0.689 | 2.58   | ND                          |       |                         | 1.47    | 0.175 | 1.5   |
| 19 M            | 15       | 0.324         | 0.013  | 13.1      | 0.633 | 4.04   | ND                          |       |                         | 0.402   | 0.033 | 1.2   |
| 20 F            | 28       | 2.37          | 0.238  | 20.3      | 0.083 | 0.86   | ND                          |       |                         | 2.68    | 0.694 | 1.1   |
| 21 M            | 16       | 1.1           | 0.077  | 17.7      | 0.571 | 1.61   | ND                          |       |                         | 1.5     | 0.328 | 1.4   |

InHg<sub>labile</sub> is defined as inorganic Hg susceptible to derivatisation. InHg<sub>bound</sub> was operationally defined as HgT - (MeHg + Hg<sub>labile</sub>). Asterisk (\*) indicates whales, which tooth for age determination was not available and therefore the length of the individual was used for estimation of the age. ND indicated values, which were not defined. SD is standard of triplicate sample analysis. All concentrations are calculated in the wet weight.



**Table S3 Hg L<sub>III</sub> and Se K-edge speciation results generated by synchrotron XANES analysis.**

| Tissue | Hg speciation (%) |      |          |          | Se speciation (%) |      |                      |       |          |                   |          |
|--------|-------------------|------|----------|----------|-------------------|------|----------------------|-------|----------|-------------------|----------|
|        | HgSe              | MeHg | MeHg-GSH | R-factor | SeCys             | HgSe | [SeCys] <sub>2</sub> | SeMet | Me-SeMet | TMSe <sup>+</sup> | R-factor |
| L 6    | LOD               | LOD  | LOD      | -        | 12                | 10   | 15                   | 39    | 22       | 2                 | 0.001    |
| L 11   | 88                | 4    | 9        | 0.004    | 5                 | 66   | 12                   | 9     | LOD      | 8                 | 0.018    |
| B 11   | 79                | 9    | 12       | 0.004    | LOD               | 69   | 14                   | 10    | LOD      | 7                 | 0.004    |

Dash (-) indicates species below the instrumental limit of detection.

Tissue: L 6 = Liver 6; L 11 = Liver 11; B 11 = Brain 11

**Table S4 Results of single-particle ICP-MS analysis, showing the largest measured size (nm) of the detected particles and the number of detected particles in the selected liver and brain tissues of pilot whales.**

| Tissue | Whale ID | Age year | Gender | Max particle size (nm) |     | Particle concentration (particles L <sup>-1</sup> ) |          |
|--------|----------|----------|--------|------------------------|-----|-----------------------------------------------------|----------|
|        |          |          |        | Hg                     | Se  | Hg                                                  | Se       |
| Liver  | 1        | 3        | F      | 247                    | 186 | 8.40E+08                                            | 9.34E+07 |
|        | 2        | 26       | F      | 404                    | 400 | 2.07E+11                                            | 1.75E+11 |
|        | 3        | 17       | F      | 467                    | 538 | 2.89E+10                                            | 2.49E+10 |
|        | 4        | 25*      | F      | 346                    | 359 | 2.31E+11                                            | 1.13E+11 |
|        | 5        | 20       | F      | 364                    | 361 | 1.52E+11                                            | 1.27E+11 |
|        | 6        | 1*       | F      | 163                    | ND  | 6.72E+08                                            | ND       |
|        | 7        | 1*       | F      | ND                     | ND  | ND                                                  | ND       |
|        | 8        | 1*       | F      | ND                     | ND  | ND                                                  | ND       |
|        | 9        | 6*       | M      | 425                    | 339 | 2.10E+10                                            | 1.10E+10 |
|        | 10       | 4        | F      | 371                    | 260 | 2.95E+10                                            | 1.52E+10 |
|        | 11       | 29       | F      | 363                    | 433 | 2.21E+11                                            | 1.72E+11 |
|        | 12       | 3        | F      | 274                    | 332 | 9.29E+08                                            | 4.40E+08 |
|        | 13       | 9        | F      | 366                    | 325 | 2.26E+10                                            | 7.27E+09 |
|        | 14       | 3        | M      | 286                    | 279 | 1.89E+09                                            | 3.87E+08 |
|        | 15       | 36       | F      | 405                    | 499 | 2.22E+10                                            | 1.79E+10 |
|        | 16       | 4        | M      | 250                    | 373 | 7.87E+09                                            | 3.23E+09 |
|        | 17       | 2        | M      | 237                    | 208 | 5.00E+09                                            | 1.33E+09 |
|        | 18       | 25       | F      | 253                    | 229 | 4.84E+10                                            | 1.47E+10 |
|        | 19       | 15       | M      | 358                    | 453 | 1.77E+10                                            | 9.33E+09 |
|        | 20       | 28       | F      | 488                    | 369 | 7.68E+11                                            | 5.94E+11 |
|        | 21       | 16       | M      | 538                    | 559 | 9.84E+10                                            | 5.31E+10 |
| Brain  | 2        | 26       | F      | 379                    | 399 | 1.03E+11                                            | 9.04E+10 |
|        | 5        | 20       | F      | 363                    | 335 | 7.15E+10                                            | 5.00E+10 |
|        | 10       | 4        | F      | 149                    | 160 | 2.84E+10                                            | 1.61E+10 |
|        | 11       | 29       | F      | 352                    | 436 | 6.36E+10                                            | 5.88E+10 |
|        | 13       | 9        | F      | 193                    | 235 | 1.95E+10                                            | 2.08E+10 |

Measurement was performed twice, first monitoring  $m/z$  <sup>202</sup>Hg and then  $m/z$  <sup>77</sup>Se as detection of both  $m/z$  simultaneously is not possible. Asterisk (\*) indicates whales, which tooth for age determination was not available and therefore the length of the individual was used for estimation of the age. ND indicated values, which were not determined.
